# Supplementary material for: Perilla frutescens Extracts Enhance DNA Repair Response in UVB Damaged HaCaT Cells
Source: PubMed Central journal article supplement (PMC8070160; doi:10.3390/nu13041263), 2021-04-12
Supplement: nutrients-13-01263-s001.pdf [file nutrients-13-01263-s001.pdf]

## Supplementary Figures

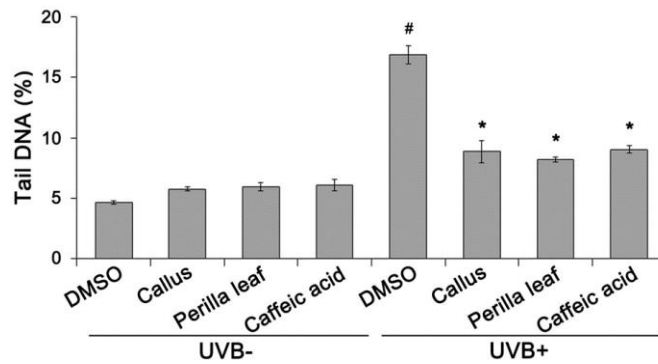

**Figure S1.** DNA damage was assessed using the Comet assay. Tail DNA percentages were determined. Comet images revealed different degrees of DNA damage. HaCaT cells were cultured in 6-well plates and pretreated with Perilla leaf or callus extracts (at 0.1  $\mu\text{g}/\text{ml}$ ), caffeic acid (150  $\mu\text{M}$ ; the positive control), or DMSO (the negative control) for 12 hours, and then exposed to UVB (30  $\text{mJ}/\text{cm}^2$ ). Image fluorescence intensities were obtained using the Comet assay. . # $p < 0.05$ ; significant versus UVB non-treated and DMSO controls. \* $p < 0.05$ ; significant versus UVB treated and DMSO controls.

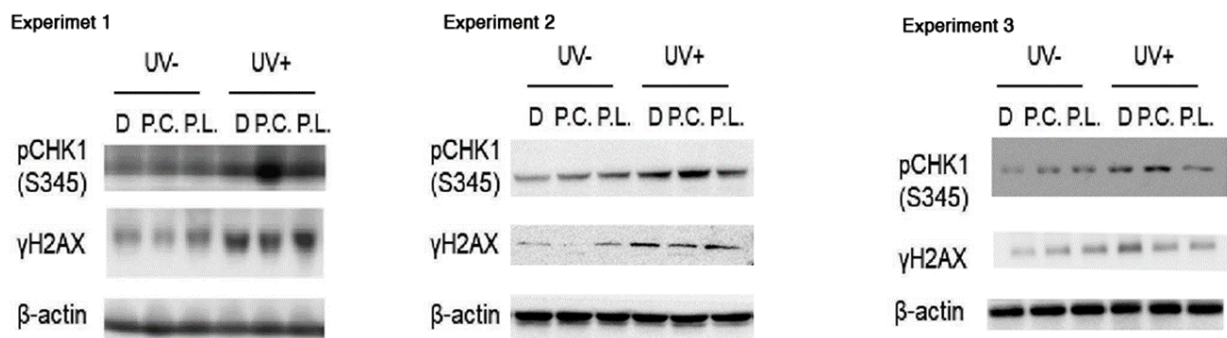

**Figure S2.** All images of western blot for pCHK1 (S345) and  $\gamma\text{H2AX}$  proteins in HaCaT cells treated with Perilla leaf or callus extracts at 0.1  $\mu\text{g}/\text{ml}$  (D: DMSO treatment; P.C: Perilla callus; P.L: Perilla leaf).  $\beta\text{-actin}$  was used as the loading control. The experiments were performed in three biological independent trials. Keratinocytes were treated with Perilla extracts overnight, washed with PBS, and irradiated with UVB (30  $\text{mJ}/\text{cm}^2$ ), and 3 hrs later, pellets were harvested for western blotting.
